# Supplementary material for: Reference-agnostic representation and visualization of pan-genomes
Source: PubMed Central journal article supplement (PMC8520301; doi:10.1186/s12859-021-04424-w), 2021-10-16
Supplement: 12859_2021_4424_MOESM1_ESM.pdf [file 12859_2021_4424_MOESM1_ESM.pdf]

# Reference-agnostic Representation and Visualization of Pan-genomes (Supplementary Materials)

Qihua Liang<sup>1</sup> and Stefano Lonardi<sup>1,\*</sup>

<sup>1</sup>Department of Computer Science and Engineering, University of California, Riverside, CA 92521, USA

\*e-mail: stelo@ucr.edu

## 1 An Example of PGV's Consensus Algorithm

2 In the example in Figure S1(b) we assume that PGV arbitrarily starts from  $C_2$ , and initializes the consensus ordering  
3  $O = \{C_2\}$ . Then, PGV collects the frequencies for the neighbors of  $C_2$ :  $C_6$  occurs four times,  $C_3$  occurs three times,  
4  $C_1$  occurs two times, and  $C_5$  occurs one time.  $C_6$  with majority vote is added to  $O$ , resulting in  $O = \{C_6 \rightarrow C_2\}$ .  
5 In Step 2, PGV collects the frequencies for the neighbors of  $C_6$ . In the top two, only  $C_5$  is not in  $O$ , and thus we  
6 extend  $O = \{C_5 \rightarrow C_6 \rightarrow C_2\}$ . Similarly, in Step 4 and 5,  $C_4$  and  $C_3$  are appended to the consensus. In Step 6,  $C_3$   
7 cannot be extended because both its top two neighbors are already in  $O$ . Thus PGV starts a new path by arbitrarily  
8 picking  $C_1$ , thus now  $O = \{C_1, C_3 \rightarrow C_4 \rightarrow C_5 \rightarrow C_6 \rightarrow C_2\}$ . The top two neighbors of  $C_1$  are  $H$  and  $C_2$ . Since  $C_2$   
9 is in  $O$ , only  $H$  is appended to  $C_1$ . PGV cannot extend  $H$  because  $H$  is a boundary. In Step 8, a new path is created  
10 which is extended in Step 9 to the other chromosome boundary. The preliminary set of consensus ordering is thus  
11  $O = \{p_1 = C_3 \rightarrow C_4 \rightarrow C_5 \rightarrow C_6 \rightarrow C_2, p_2 = C_1 \rightarrow H, p_3 = C_7 \rightarrow T\}$ . At this point, PGV aligns  $p_1$ ,  $p_2$  and  $p_3$  to  
12 the individual genome orderings to decide their orientations. For instance, the alignment score of  $H \rightarrow C_1$  is higher  
13 than the alignment score of  $C_1 \rightarrow H$ , so  $p_2$  is reversed. Paths  $p_1$  and  $p_3$  are left as is. Then, PGV checks whether  $p_1$ ,  
14  $p_2$  and  $p_3$  have a good agreement with the input genomes. For instance, the alignment score of  $p_1$  against the five  
15 input genomes is 4, 3, 5, 3, and 3, respectively. The total score for  $p_1$  is 18, which is lower than 80% of the highest  
16 possible score, which is  $0.8 * 5 * 5 = 20$ . Based on this, PGV considers  $p_1$  not to be a good ordering and it breaks it,  
17 as follows. The highest scoring sub-path of  $p_1$  is  $C_3 \rightarrow C_4 \rightarrow C_5 \rightarrow C_6$  on the majority of the input genomes, so  
18 PGV splits  $p_1$  into  $p_4 = C_3 \rightarrow C_4 \rightarrow C_5 \rightarrow C_6$  and  $p_5 = C_2$ , thus now  $O = \{p_2, p_3, p_4, p_5\}$ . PGV again checks the  
19 alignments of  $p_2, p_3, p_4, p_5$  in  $O$ . If any of them is not sufficiently high (i.e., at least 80% of the maximum score),  
20 it will be broken again. Once this iterative process is concluded, each path in  $O$  is aligned against the genomes  
21 and the starting position of its best alignment is recorded. The position with most votes (majority) determines the  
22 coordinate of each path. For instance, the best alignment of  $p_4$  on the input genomes are at position 4,3,4,6 and 5,

1 respectively. Thus,  $p_4$  is given coordinate 4. Similarly, PGV assigns  $p_2$  position 1,  $p_3$  position 8 and  $p_5$  position  
2 3. Based on these coordinate, PGV orders the paths as  $p_2 \rightarrow p_5 \rightarrow p_4 \rightarrow p_3$  which provides the final consensus  
3 ordering  $H \rightarrow C_1 \rightarrow C_2 \rightarrow C_3 \rightarrow C_4 \rightarrow C_5 \rightarrow C_6 \rightarrow C_7 \rightarrow T$ .

Genome 1 ...CAGTAAAAATATATTTTATCATGTTTTTACTTATTGAA...  
 Genome 2 ...CAGTAAAAATATATTTTATCATGTTTTTACTTATTGAA...  
 Genome 3 ...TTGCATCCAGTAAAAATATATTTTATCATGTTTTCT...  
 Genome 4 ...TATTTATCATGCAGTAAAAATTTTACTTATTGAAAT...  
 Genome 5 ...CAGTAAAAATATATGAAAAATTTTACTTATTGAAAT...

Multiple Genome Alignment

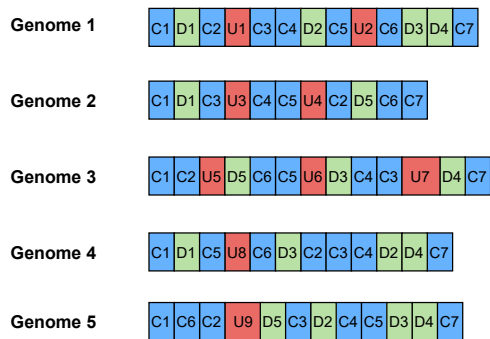

Block Ordering

Genome 1 C1→D1→C2→U1→C3→C4→D2→C5→U2→C6→D3→D4→C7  
 Genome 2 C1→D1→C3→U3→C4→C5→U4→C2→D5→C6→C7  
 Genome 3 C1→C2→U5→D5→C6→C5→U6→D2→C4→C3→U7→D4→C7  
 Genome 4 C1→D1→C5→U8→C6→D3→C2→C3→C4→D2→D4→C7  
 Genome 5 C1→C6→C2→U9→D5→C3→D2→C4→C5→D5→D4→C7

(a)

Position 1 2 3 4 5 6 7 8 9  
 Genome 1 H→C1→C2→C3→C4→C5→C6→C7→T  
 Genome 2 H→C1→C3→C4→C5→C2→C6→C7→T  
 Genome 3 H→C1→C2→C6→C5→C4→C3→C7→T  
 Genome 4 H→C1→C5→C6→C2→C3→C4→C7→T  
 Genome 5 H→C1→C6→C2→C3→C4→C5→C7→T

Build Consensus

| Steps | Operations                             | Consensus                      | Neighbors                  |
|-------|----------------------------------------|--------------------------------|----------------------------|
| 1     | Arbitrarily pick C2                    | C2                             | {C6:4} C3:3 C1:2 C5:1      |
| 2     | Add C6                                 | C6→C2                          | {C2:4 C5:3} C7:2 C1:1      |
| 3     | Add C5                                 | C5→C6→C2                       | {C4:4 C6:3} C1:1 C2:1 C7:1 |
| 4     | Add C4                                 | C4→C5→C6→C2                    | {C3:5 C5:4} C7:1           |
| 5     | Add C3                                 | C3→C4→C5→C6→C2                 | {C4:5 C2:3} C1:1 C7:1      |
| 6     | Can not extend C3; arbitrarily pick C1 | C3→C4→C5→C6→C2<br>C1           | {H:5 C2:2} C3:1 C5:1 C6:1  |
| 7     | Add H                                  | C3→C4→C5→C6→C2<br>C1→H         |                            |
| 8     | Reach boundary H; arbitrarily pick C7  | C3→C4→C5→C6→C2<br>C1→H<br>C7   | {T:5 C6:2} C3:1 C4:1 C5:1  |
| 9     | Add T                                  | C3→C4→C5→C6→C2<br>C1→H<br>C7→T |                            |

O C3→C4→C5→C6→C2  
 C1→H  
 C7→T

Resolve Misjoins/Orientations

O C3→C4→C5→C6  
 C2  
 C1→H  
 C7→T

Stitching

Final Output: H→C1→C2→C3→C4→C5→C6→C7→T

(b)

**Figure S1.** A detailed example of PGV's processing steps. (a) the input to PGV is a set of  $n = 5$  genomes; PGV first carries out a multiple sequence alignment, then classifies each alignment block into core blocks (C), dispensable block (D) and unique block (U); each genome is then converted in an ordered sequence of C-, D-, and U-blocks, each with its corresponding identifier; (b) in the second phase, PGV computes the consensus ordering of the common blocks; red C-nodes are the active nodes; green C-nodes are the neighbors selected to be added to the linear ordering

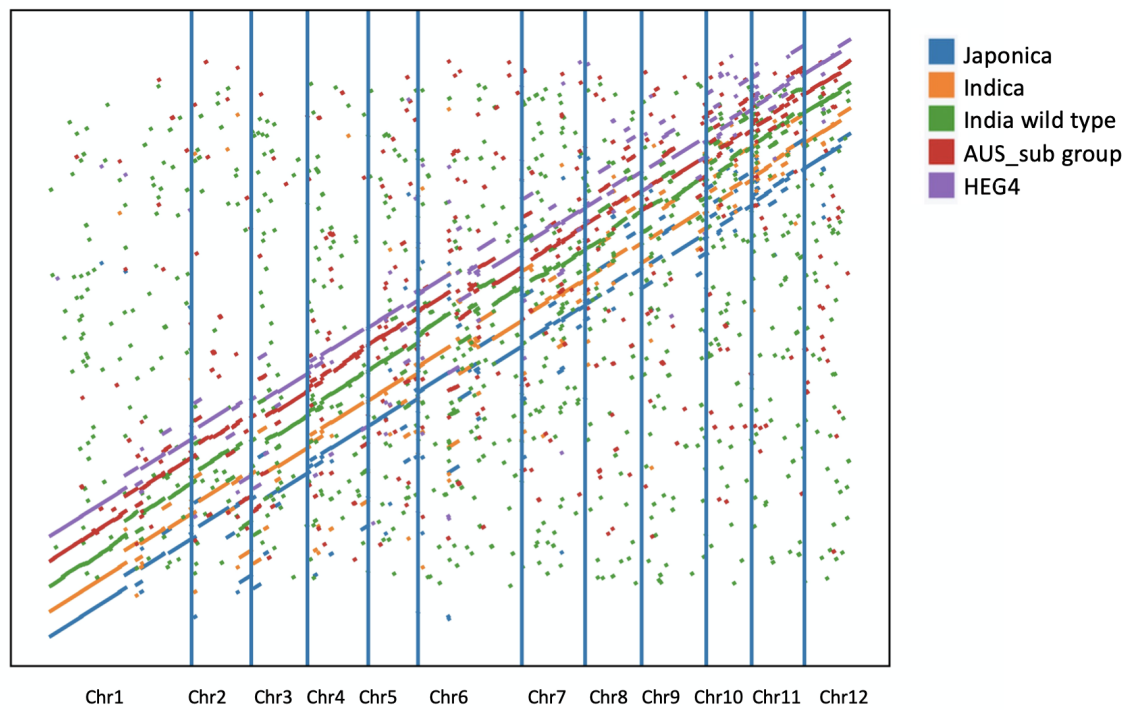

**Figure S2.** Rice pan-genome analysis using PGV. The x-axis represents the coordinates of the consensus ordering of core blocks computed by PGV. Genomes coordinates for the core blocks are used on the y-axis (staggered to avoid overlapping lines).
